# Supplementary material
Source: bioRxiv or medRxiv preprint supplement (https://www.biorxiv.org/content/biorxiv/early/2020/04/24/2020.04.23.055756/DC1/embed/media-1.pdf)
Supplement: Supplementary file [file media-1.pdf]

Amantadine

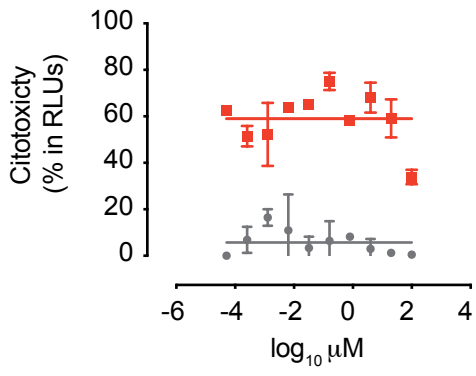

E64-d

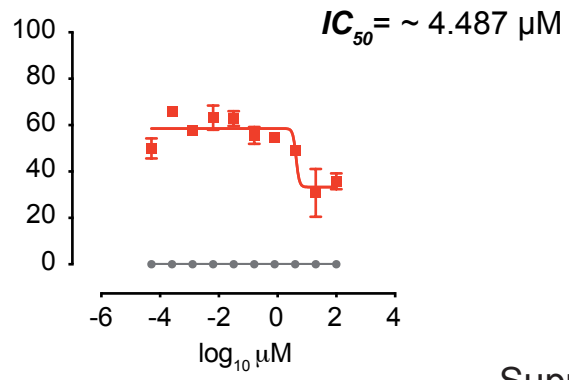

Supplemental Figure 1

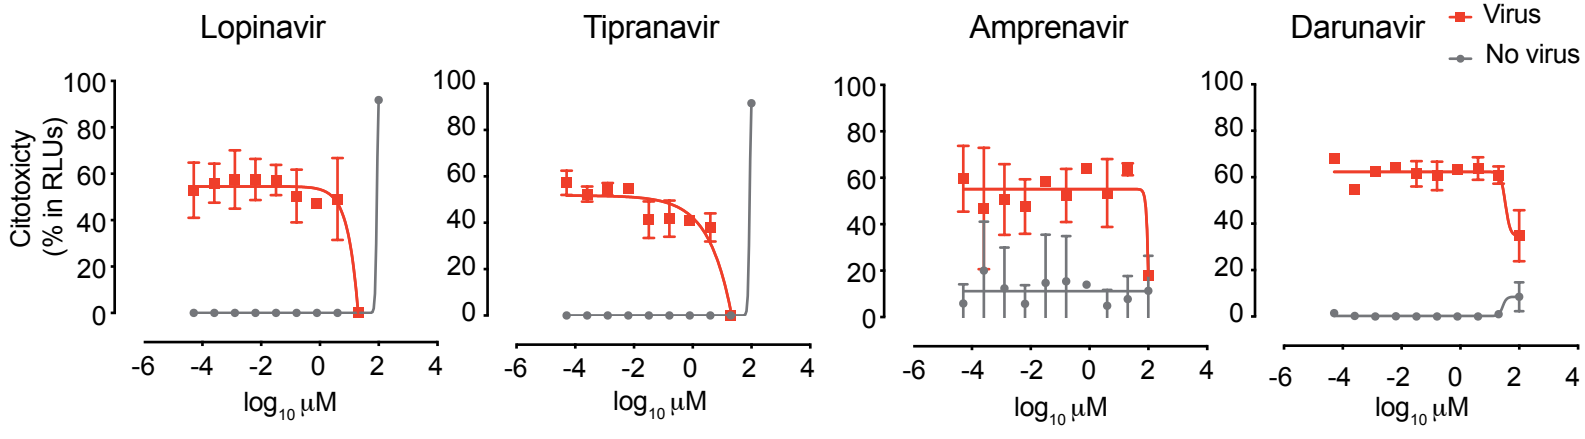

Supplemental Figure 2

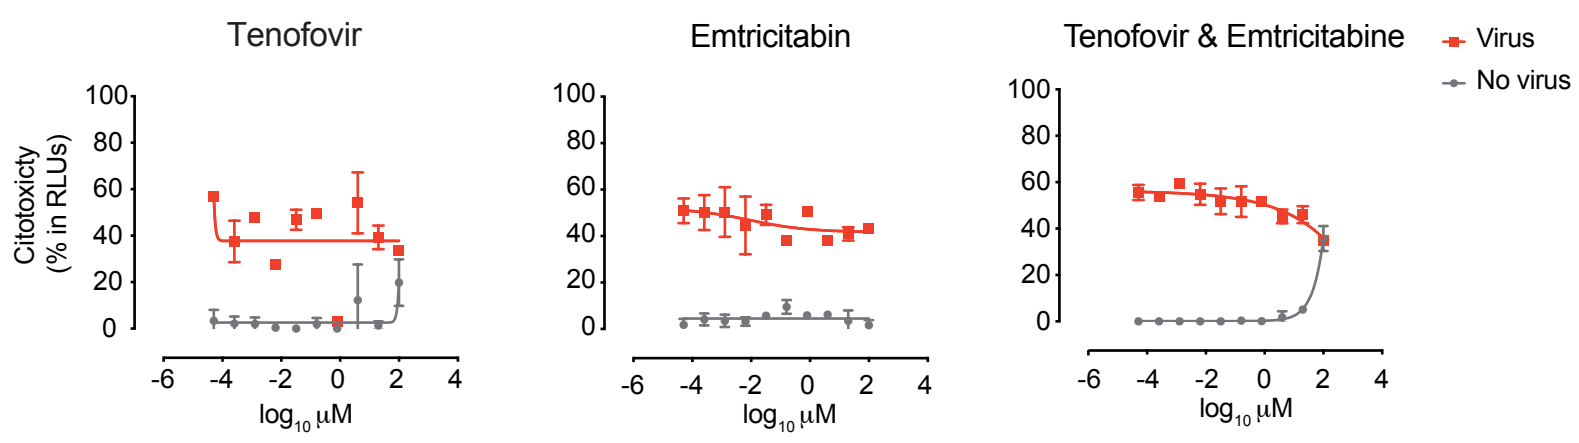

Supplemental Figure 3
